# Supplementary material for: Analysis of novel hyperosmotic shock response suggests ‘beads in liquid’ cytosol structure
Source: PubMed Central journal article supplement (PMC6679407; doi:10.1242/bio.044529), 2019-07-08
Supplement: biolopen-8-044529-s1.pdf [file biolopen-8-044529-s1.pdf]

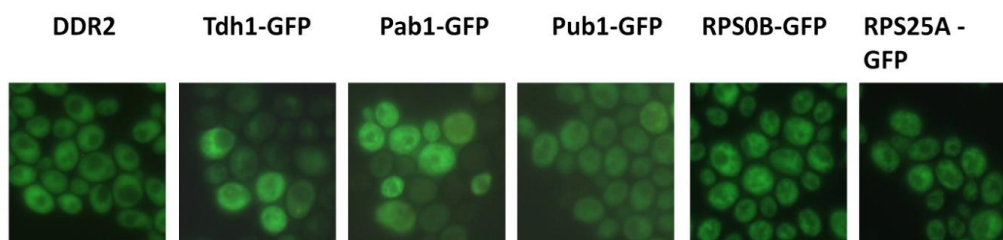

**Figure S1. Examples of cytoplasmic proteins that do not form OSFs.** – *Cells producing the indicated GFP fusion proteins were grown on YP-Gly medium to log phase and transferred onto the same medium with 1M KCl.*

Fas2-GFP

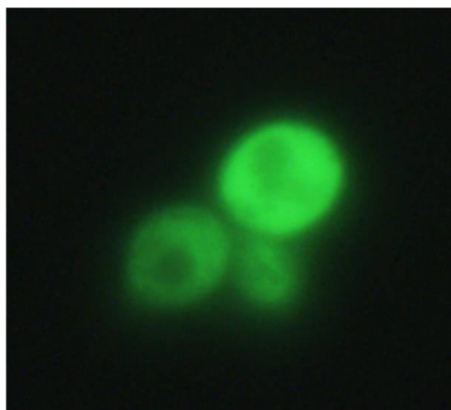

No KCl

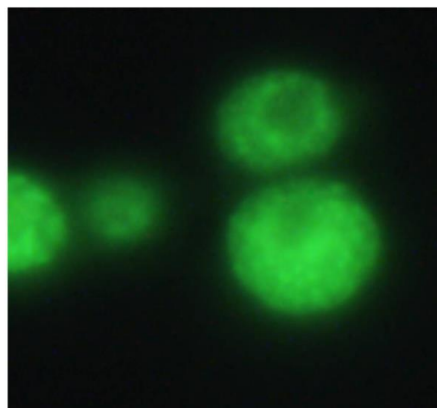

1M KCl

Hsp104-GFP

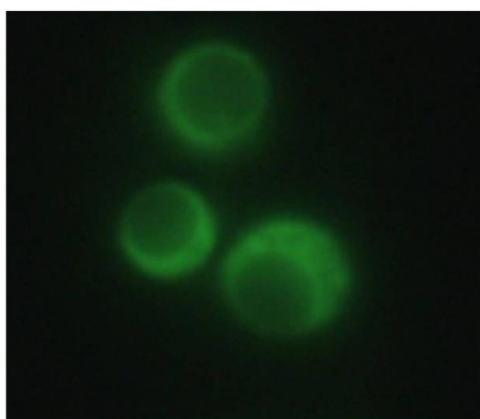

No KCl

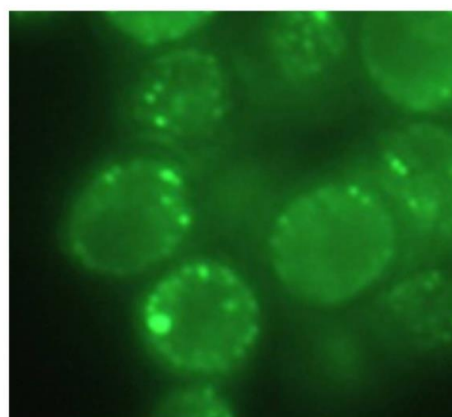

1M KCl

Hsp42-GFP

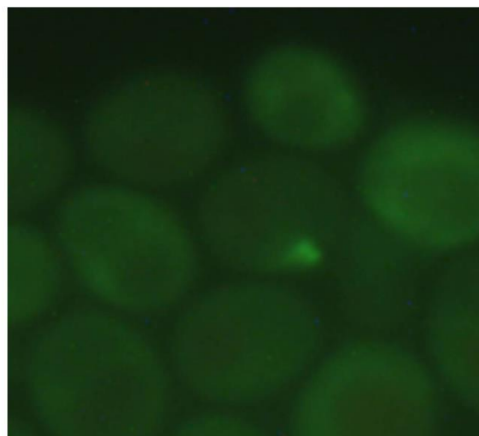

No KCl

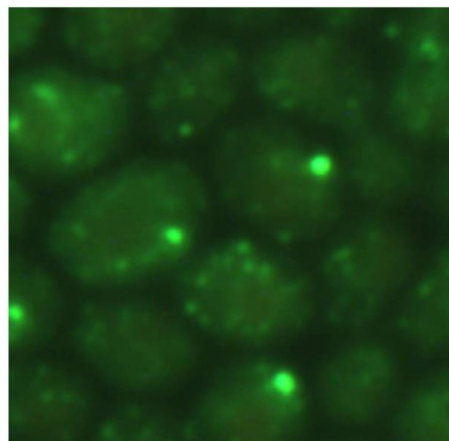

1M KCl

Hsp26-GFP

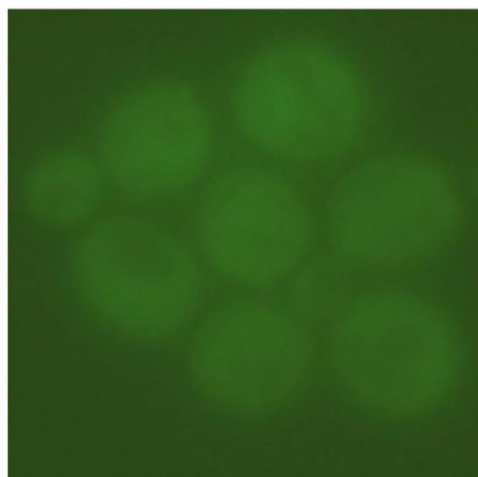

No KCl

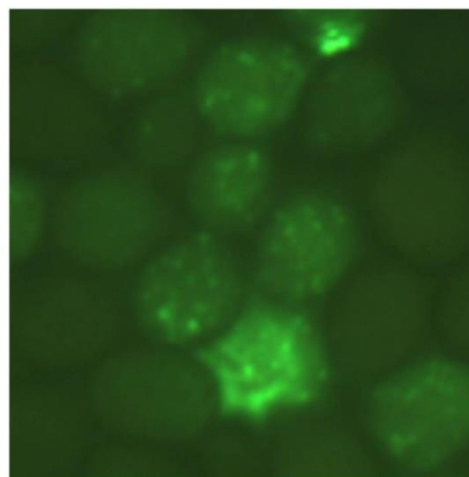

1M KCl

Ssa1-GFP

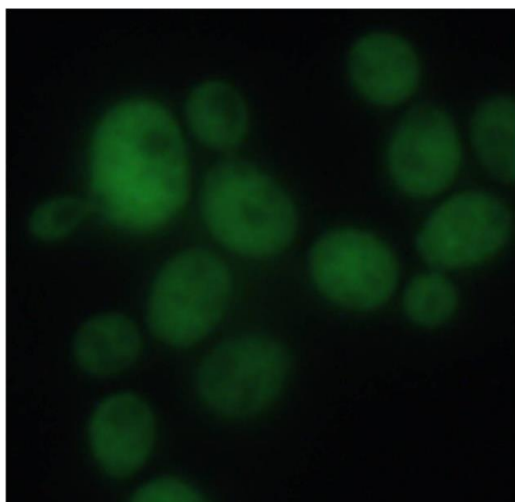

No KCl

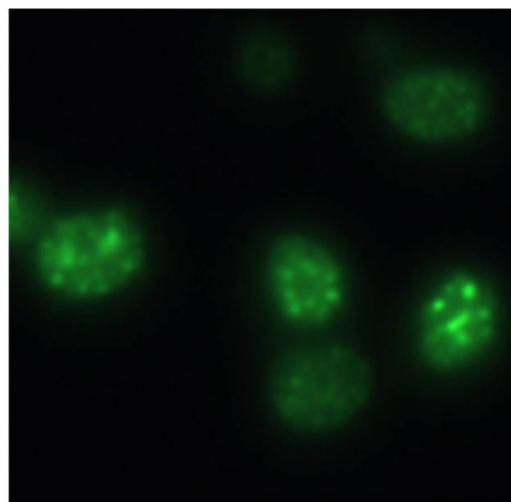

1M KCl

Ssa2-GFP

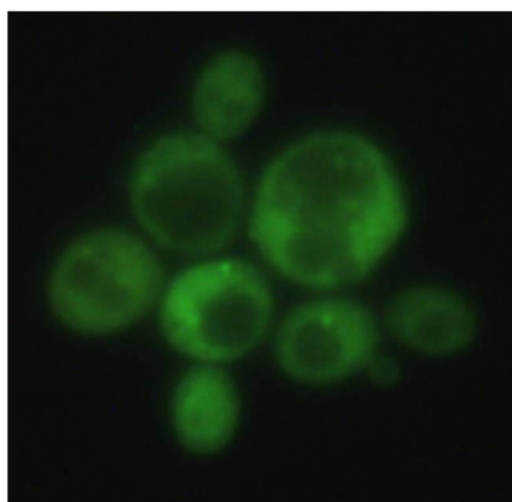

No KCl

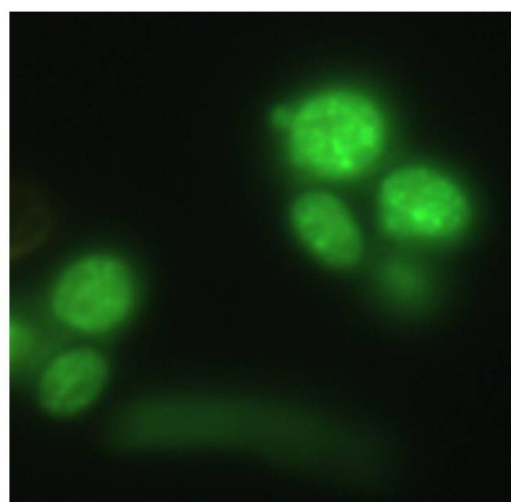

1M KCl

Ydj1-GFP

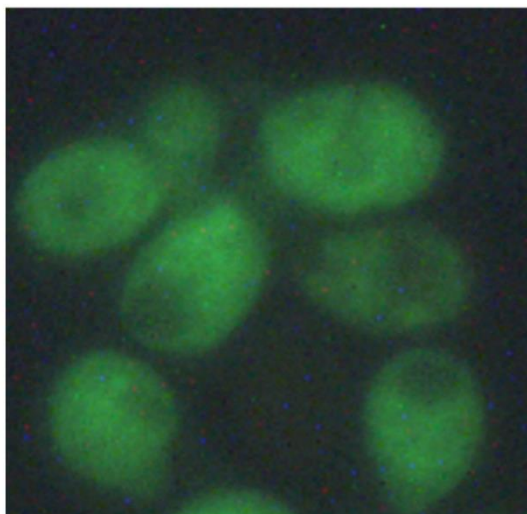

No KCl

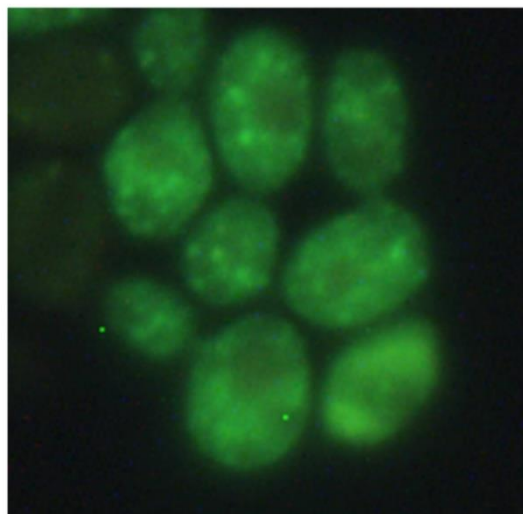

1M KCl

Sis1-GFP

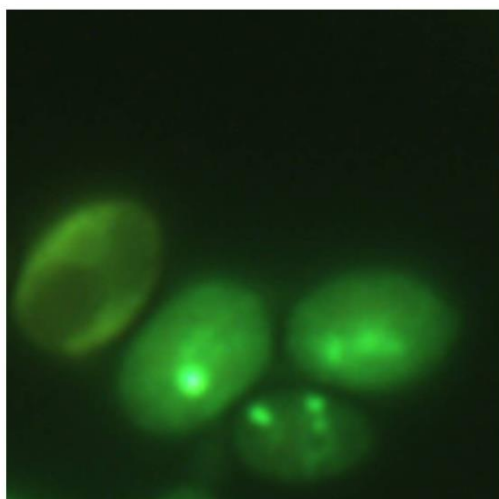

No KCl

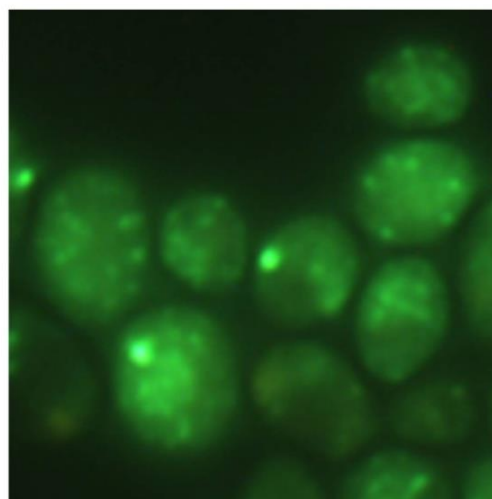

1M KCl

Tsa1-GFP

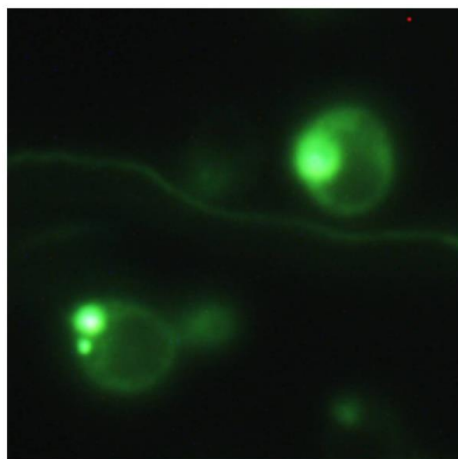

No KCl

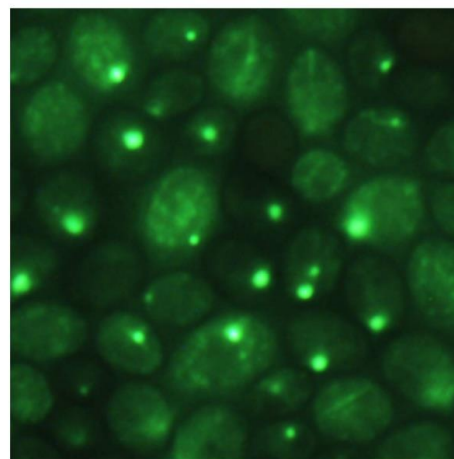

1M KCl

Tps1-GFP

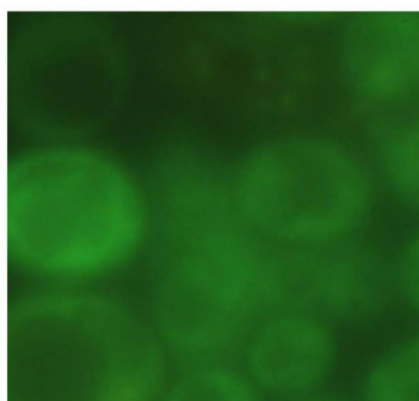

No KCl

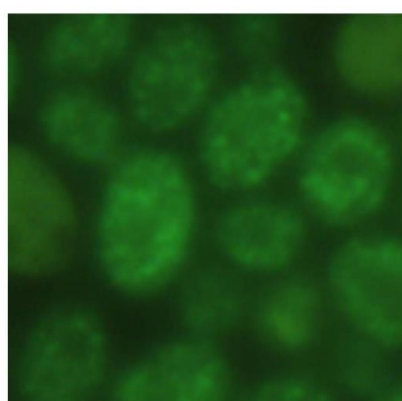

1M KCl

Gln1-GFP

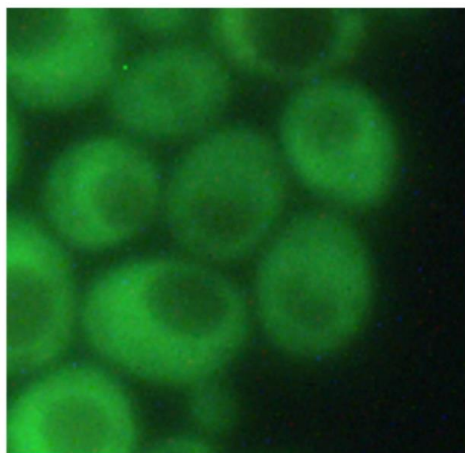

No KCl

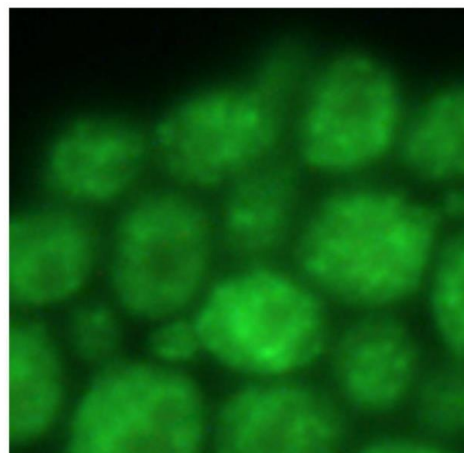

1M KCl

YGL082W-GFP

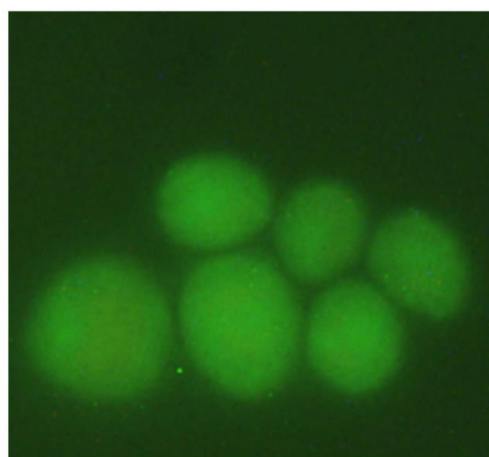

No KCl

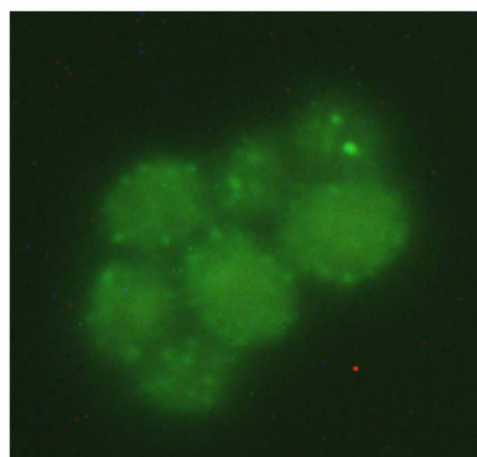

1M KCl



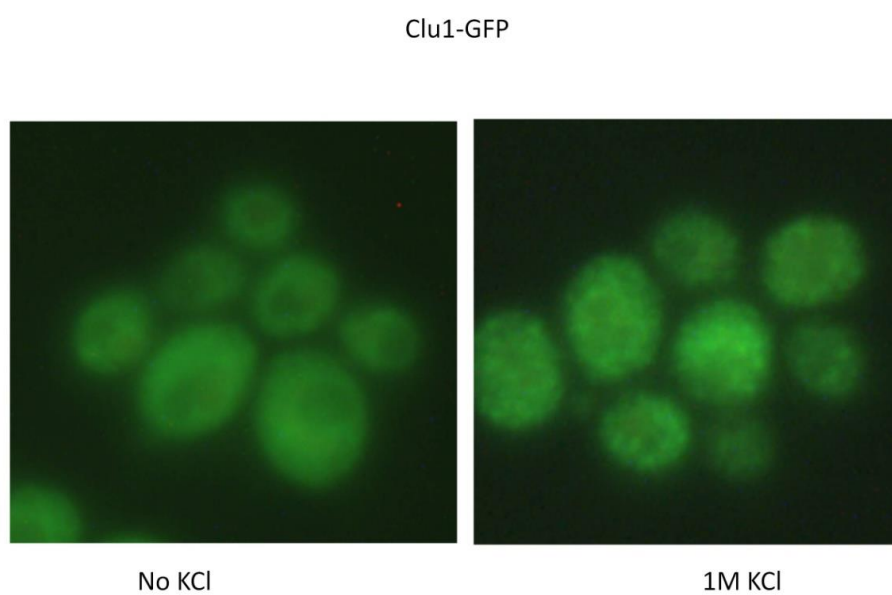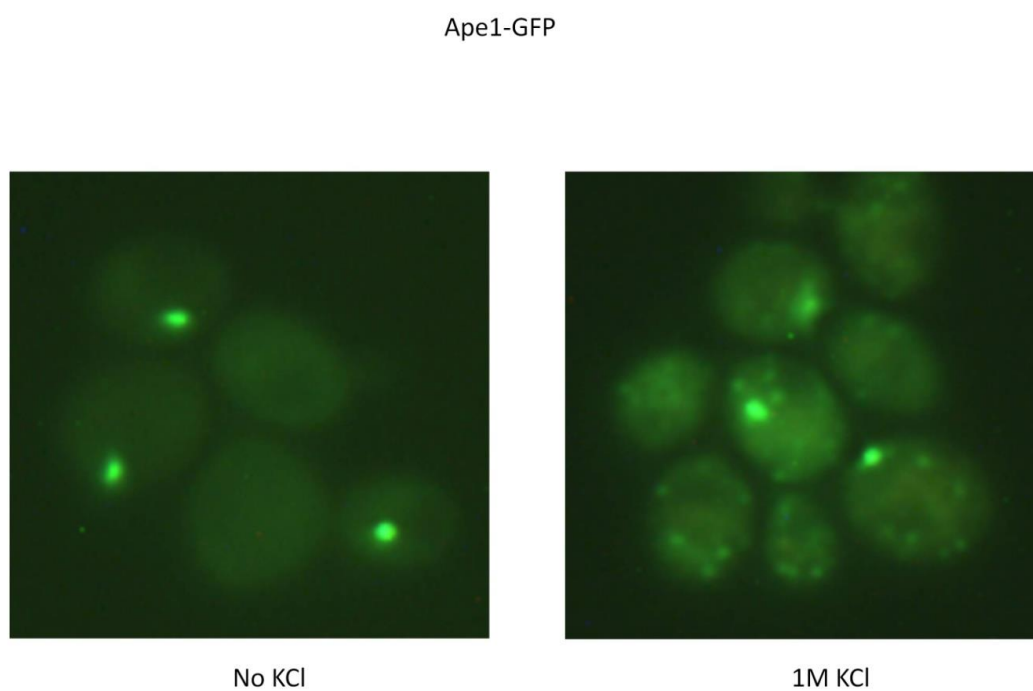

**Figure S2. Images of strains producing GFP-fusions of various proteins found to form OSFs, without and with hyperosmotic shock (1M KCl).**





## 127-ddr-hph Map

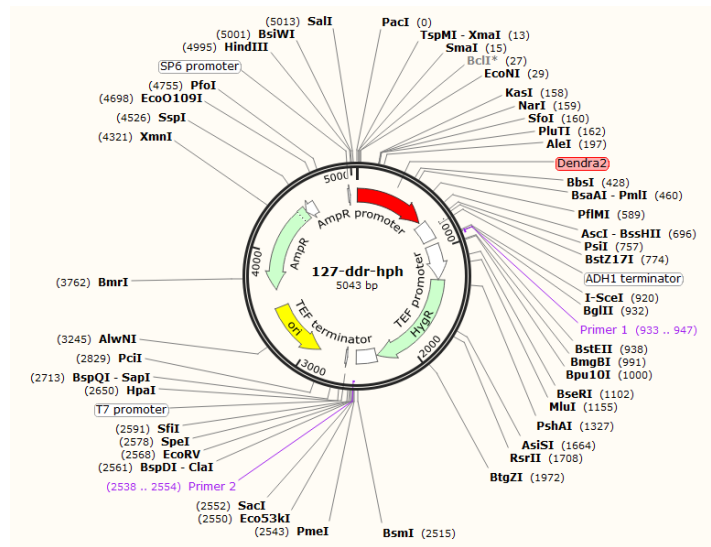

Fig. S3. Plasmid maps.

**Table S1. Primers used in this work**

|              |                                                                |
|--------------|----------------------------------------------------------------|
| DL_SSA_U2    | GGTTGATTAGATATAGAGTAAGCT                                       |
| DL_SSA_L_Xho | TTCTCGAGATCAACCTCCTCAACAGTTG                                   |
| Ssa1ET-D     | AGCTCCAGAGGCTGAAGGTCCAACCGTTGAAGAAGTTGATGG<br>TGACGGTGCTGGTTTA |
| Ssa1ET-R     | AAAGACATTTTCGTTATTATCAATTGCCGCACCAATTGGCTCG<br>ATGAATTCGAGCTCG |
| Mot3-Df      | ATCGGACTACTAGCAG CAATGAATGCGGACCATC                            |
| Mot3-Rf      | TTCTTGGTAGCATTGG GCAGAGGTTGTGCCGGGT                            |
| Pan1-Df      | ATCGGACTACTAGCAG GGCATGGGTTACCAGC                              |
| Pan1-Rf      | TTCTTGGTAGCATTGG GAGCTTGGTTTTGCGG                              |

**Table S2. Plasmids used in this work.**

|                    |                                                                                                                               |                         |
|--------------------|-------------------------------------------------------------------------------------------------------------------------------|-------------------------|
| pAM783             | Integrative plasmid for endogenous tagging of <i>O. parapolymorpha</i> Hsp70 with tagGFP                                      | This work               |
| pAM781D            | Integrative plasmid for replacement of GFP::HIS3 module in the GFP Fusion collection with tagRFP::URA3                        | This work               |
| 127-DDR-hph        | Template plasmid for endogenous tagging of proteins with DDR2 (HygR selection marker)                                         | Gift from D. Kaganovich |
| pGal-HO            | Autonomous plasmid for mating-type switching, <i>LEU2</i> and <i>URA3</i> auxotrophic markers, galactose-inducible promoter   | unknown source          |
| pYES2-Sup35NMH-GFP | Autonomous multicopy plasmid for expression of the prion domain of Sup35 tagged with GFP, galactose-inducible promoter        | This work               |
| pYES2-PrDMot3-GFP  | Autonomous multicopy plasmid for expression of the prion domain of Mot3 tagged with GFP, galactose-inducible promoter         | This work               |
| pYES2-PrDPan1-GFP  | Autonomous multicopy plasmid for expression of the amyloidogenic domain of Pan1 tagged with GFP, galactose-inducible promoter | This work               |

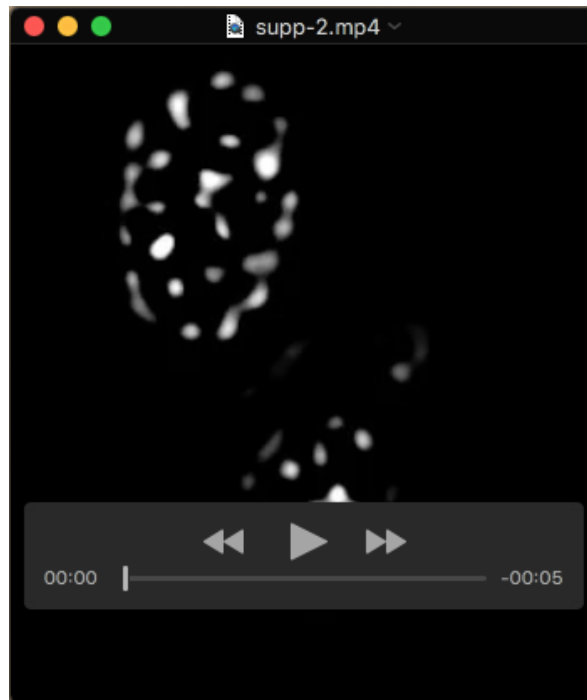

**Movie 1. Animated Z-stacked images of Ssa1-DDR OSFs obtained by SIM microscopy.**

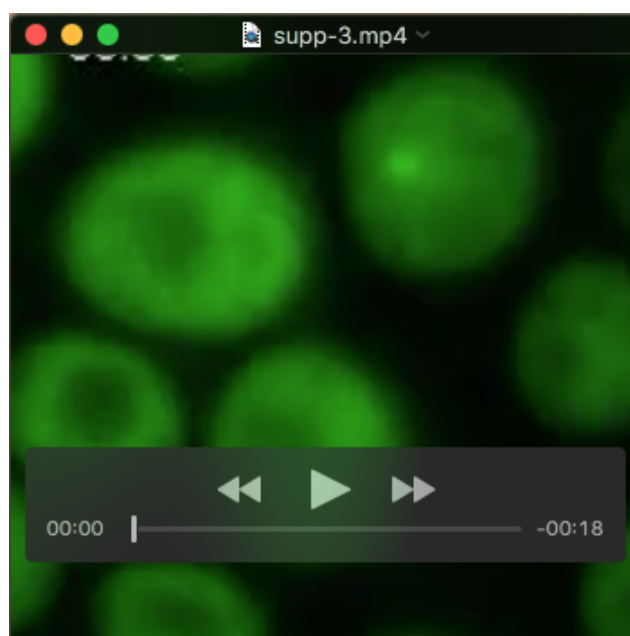

**Movie 2. Video of sequential appearance and disappearance of OSFs in response to addition of KCl and its replacement for normosmotic medium.** KCl added at 00:13, KCl exchanged for normosmotic medium at 01:59, new addition of KCl at 02:28.
